# Supplementary material
Source: PubMed Central journal article supplement (PMC4038126)
Supplement: NIHMS331427-supplement-01.pdf [file NIHMS331427-supplement-01.pdf]

# Cell-Free Protein Synthesis: Applications Come of Age

Erik D. Carlson<sup>1,2,\*</sup>, Rui Gan<sup>1,2,\*</sup>, C. Eric Hodgman<sup>1,2</sup>, and Michael C. Jewett<sup>1,2,3,†</sup>

<sup>1</sup>Department of Chemical and Biological Engineering

<sup>2</sup>Chemistry of Life Processes Institute

<sup>3</sup>Member, Robert H. Lurie Comprehensive Cancer Center

Northwestern University, 2145 Sheridan Road, Evanston, IL 60208, USA

\*These authors contributed equally

†Correspondence to [m-jewett@northwestern.edu](mailto:m-jewett@northwestern.edu)

## Supplementary Information

## 1. Supplementary Tables

Supplementary Table 1 – Historical Trends of Cell-Free Protein Synthesis Systems

Figure 3a – Protein Yield (Batch)

| Year | System | Yields (mg/mL) | Protein Expressed                 | Citation                                                                                                                                                                                                                                                  |
|------|--------|----------------|-----------------------------------|-----------------------------------------------------------------------------------------------------------------------------------------------------------------------------------------------------------------------------------------------------------|
| 1996 | ECE    | 0.1            | chloramphenicol acetyltransferase | (Kim <i>et al.</i> , 1996)                                                                                                                                                                                                                                |
| 1999 | ECE    | 0.15           | chloramphenicol acetyltransferase | (Kim and Swartz, 1999)                                                                                                                                                                                                                                    |
| 2000 | WGE    | 0.6            | tobacco mosaic virus              | (Madin <i>et al.</i> , 2000)                                                                                                                                                                                                                              |
| 2001 | ECE    | 0.52           | chloramphenicol acetyltransferase | (Kim and Swartz, 2001)                                                                                                                                                                                                                                    |
| 2004 | ECE    | 0.7            | chloramphenicol acetyltransferase | (Jewett and Swartz, 2004a)                                                                                                                                                                                                                                |
| 2004 | ECE    | 0.92           | chloramphenicol acetyltransferase | (Chumpolkulwong <i>et al.</i> , 2004)                                                                                                                                                                                                                     |
| 2005 | ECE    | 0.56           | chloramphenicol acetyltransferase | (Voloshin and Swartz, 2005)                                                                                                                                                                                                                               |
| 2005 | ECE    | 0.7            | chloramphenicol acetyltransferase | (Calhoun and Swartz, 2005a)                                                                                                                                                                                                                               |
| 2008 | ECE    | 1.2            | chloramphenicol acetyltransferase | (Jewett and Swartz, 2004a)                                                                                                                                                                                                                                |
| 2010 | ICE    | 0.05           | $\beta$ -galactosidase            | (Ezure <i>et al.</i> , 2010)                                                                                                                                                                                                                              |
| 2010 | RRL    | 0.006          | firefly luciferase                | (Promega_ <a href="http://www.promega.com/resources/articles/pubhub/enotes/optimize-your-tnt-reticulocyte-lysate-systems-reaction/">http://www.promega.com/resources/articles/pubhub/enotes/optimize-your-tnt-reticulocyte-lysate-systems-reaction/</a> ) |
| 2011 | ECE    | 1.7            | chloramphenicol acetyltransferase | (Kim <i>et al.</i> , 2011)                                                                                                                                                                                                                                |

Figure 3b – Protein Yield (Fed-Batch/CECF)

| Year | System | Reaction Format           | Effective Yield (mg/mL)* | Protein Expressed                                       | References                                                  |
|------|--------|---------------------------|--------------------------|---------------------------------------------------------|-------------------------------------------------------------|
| 1988 | ECE    | CECF                      | 0.002                    | calcitonin polypeptide                                  | (Spirin <i>et al.</i> , 1988)                               |
| 1999 | ECE    | Semi-continuous           | 0.55                     | chloramphenicol acetyltransferase                       | (Kigawa <i>et al.</i> , 1999)                               |
| 2004 | ECE    | Semi-continuous           | 0.08                     | enhanced green fluorescent protein                      | (Noireaux and Libchaber, 2004)                              |
| 2004 | ECE    | Fed-batch                 | 1.4                      | chloramphenicol acetyltransferase                       | (Jewett and Swartz, 2004b)                                  |
| 2005 | ECE    | Semi-continuous           | 0.4                      | G-protein coupled receptor                              | (Klammt <i>et al.</i> , 2005)                               |
| 2000 | WGE    | Semi-continuous           | 0.36                     | dihydrofolate reductase                                 | (Madin <i>et al.</i> , 2000)                                |
| 2002 | WGE    | Semi-continuous           | 2.19                     | ζ-crystallin quinone reductase                          | (Sawasaki <i>et al.</i> , 2002b)                            |
| 2002 | WGE    | Semi-continuous (bilayer) | 1.62                     | green fluorescent protein                               | (Sawasaki <i>et al.</i> , 2002a), (Endo and Sawasaki, 2006) |
| 2004 | WGE    | Semi-continuous (bilayer) | 0.03                     | protein kinase library from <i>Arabidopsis thaliana</i> | (Sawasaki <i>et al.</i> , 2004)                             |
| 2008 | WGE    | Semi-continuous (bilayer) | 0.002                    | average of 13,364 human proteins                        | (Goshima <i>et al.</i> , 2008)                              |
| 2009 | WGE    | Semi-continuous           | 0.09                     | renilla luciferase                                      | (Park <i>et al.</i> , 2009)                                 |

\*Volume taken as final volume for fed-batch reactions, or total volume (reaction + feed solution) for CECF reactions

Figure 3c – Active Reaction Duration (Batch)

| Year | System | Active Reaction Time (hr) | Protein Expressed                 | Citation                      |
|------|--------|---------------------------|-----------------------------------|-------------------------------|
| 1996 | ECE    | 1                         | chloramphenicol acetyltransferase | (Kim <i>et al.</i> , 1996)    |
| 1999 | ECE    | 2                         | chloramphenicol acetyltransferase | (Kim and Swartz, 1999)        |
| 2000 | WGE    | 4                         | dihydrofolate reductase           | (Madin <i>et al.</i> , 2000)  |
| 2001 | ECE    | 2                         | chloramphenicol acetyltransferase | (Kim and Swartz, 2001)        |
| 2004 | ECE    | 6                         | chloramphenicol acetyltransferase | (Jewett and Swartz, 2004a)    |
| 2005 | ECE    | 4                         | chloramphenicol acetyltransferase | (Voloshin and Swartz, 2005)   |
| 2005 | ECE    | 3                         | chloramphenicol acetyltransferase | (Calhoun and Swartz, 2005b)   |
| 2008 | ECE    | 8                         | chloramphenicol acetyltransferase | (Jewett <i>et al.</i> , 2008) |
| 2011 | ECE    | 12                        | chloramphenicol acetyltransferase | (Kim <i>et al.</i> , 2011)    |

Figure 3d – Protein Synthesis Rate

| Year | System | Reaction Format | Yield (mg/mL-hr) | Protein Expressed                 | Citation                      |
|------|--------|-----------------|------------------|-----------------------------------|-------------------------------|
| 1988 | ECE    | Batch           | 0.0043           | calcitonin polypeptide            | (Spirin <i>et al.</i> , 1988) |
| 2000 | WGE    | Semi-continuous | 0.008*           | dihydrofolate reductase           | (Madin <i>et al.</i> , 2000)  |
| 2001 | ECE    | Batch           | 0.3              | chloramphenicol acetyltransferase | (Kim and Swartz, 2001)        |
| 2004 | ECE    | Batch           | 0.37             | chloramphenicol acetyltransferase | (Jewett and Swartz, 2004a)    |
| 2008 | ECE    | Batch           | 0.6              | chloramphenicol acetyltransferase | (Jewett <i>et al.</i> , 2008) |
| 2011 | ECE    | Batch           | 0.7              | chloramphenicol acetyltransferase | (Kim <i>et al.</i> , 2011)    |

\*Volume taken as final volume for fed-batch reactions, or total volume (reaction + feed solution) for CECF reactions

Figure 3e – Yield (mg/\$)<sup>†</sup>

| Year | System     | Reaction Format           | Protein Expressed                                      | Yield (mg /\$ substrate) | Yields (mg/mL)* | Citation                                                    |
|------|------------|---------------------------|--------------------------------------------------------|--------------------------|-----------------|-------------------------------------------------------------|
| 1988 | ECE<br>WGE | Continuous Exchange       | calcitonin polypeptide                                 | 0.005                    | 0.002           | (Spirin <i>et al.</i> , 1988)                               |
| 2000 | ECE        | Fed-batch                 | chloramphenicol acetyltransferase                      | 0.002                    | 0.42            | (Kim and Swartz, 2000)                                      |
| 2000 | WGE        | Batch                     | dihydrofolate reductase                                | 0.543                    | 0.36            | (Madin <i>et al.</i> , 2000)                                |
| 2002 | WGE        | Semi-continuous (Bilayer) | green fluorescent protein                              | 1.835                    | 1.6             | (Sawasaki <i>et al.</i> , 2002a), (Endo and Sawasaki, 2006) |
| 2004 | ECE        | Batch                     | chloramphenicol acetyltransferase                      | 1.200                    | 0.7             | (Jewett and Swartz, 2004a)                                  |
| 2005 | ECE        | Batch                     | chloramphenicol acetyltransferase                      | 0.237                    | 0.56            | (Voloshin and Swartz, 2005)                                 |
| 2005 | ECE        | Batch                     | chloramphenicol acetyltransferase                      | 18.287                   | 0.68            | (Calhoun and Swartz, 2005a)                                 |
| 2008 | ECE        | Batch CSTR (Cytomim)      | chloramphenicol acetyltransferase                      | 9.554                    | 0.62            | (Jewett <i>et al.</i> , 2008)                               |
| 2008 | WGE        | Semi-continuous (Bilayer) | average of 13,364 human proteins                       | 0.002                    | 0.002           | (Goshima <i>et al.</i> , 2008)                              |
| 2009 | ECE        | Batch                     | esterase 2                                             | 0.059                    | 0.28            | (Wang and Zhang, 2009)                                      |
| 2011 | ECE        | Batch CSTR                | human granulocyte macrophage colony-stimulating factor | 10.439                   | 0.7             | (Zawada <i>et al.</i> , 2011)                               |
| 2011 | ECE        | Batch                     | chloramphenicol acetyltransferase                      | 3.056                    | 1.7             | (Kim <i>et al.</i> , 2011)                                  |

\*Volume taken as final volume for fed-batch reactions, or total volume (reaction + feed solution) for CECF reactions

<sup>†</sup>Yield based on mg of protein synthesized per \$ nucleotides (i.e., ATP, ADP, AMP, GTP, etc.), secondary energy source (i.e., phosphoenolpyruvate, creatine phosphate, sodium pyruvate, glucose, etc.), and enzymes necessary for energy regeneration (i.e., pyruvate kinase, creatine phosphokinase, etc.). Prices for products were all determined from <http://www.sigmaldrich.com/united-states.html> last accessed August 5th, 2011.

Figure 3f – Reaction Volume (Batch)

| Year | System | Protein Expressed                                      | Scale (L) | Yields (mg/mL) | Citation                      |
|------|--------|--------------------------------------------------------|-----------|----------------|-------------------------------|
| 1996 | ECE    | chloramphenicol acetyltransferase                      | 2E-5      | 0.1            | (Kim <i>et al.</i> , 1996)    |
| 1999 | ECE    | chloramphenicol acetyltransferase                      | 6E-5      | 0.15           | (Kim and Swartz, 1999)        |
| 2001 | ECE    | chloramphenicol acetyltransferase                      | 1E-4      | 0.23           | (Kim and Swartz, 2001)        |
| 2005 | ECE    | chloramphenicol acetyltransferase                      | 5E-4      | 0.56           | (Voloshin and Swartz, 2005)   |
| 2008 | ECE    | chloramphenicol acetyltransferase                      | 2E-3      | 1.2            | (Jewett <i>et al.</i> , 2008) |
| 2011 | ECE    | human Granulocyte macrophage colony-stimulating factor | 1E+2      | 0.7            | (Zawada <i>et al.</i> , 2011) |

## Supplementary Table 2 – CFPS advancement timeline

Figure 4 – CFPS advancement timeline

| Year | System | Protein Expressed                                                                                   | Yield (mg/mL) | Disulfide Bonds | Citation                         |
|------|--------|-----------------------------------------------------------------------------------------------------|---------------|-----------------|----------------------------------|
| 2002 | WGE    | ζ-crystalline quinone reductase                                                                     | 2.2           |                 | (Sawasaki <i>et al.</i> , 2002b) |
| 2003 | WGE    | single-chain antibody variable fragment against Salmonella O-antigen                                | 0.013         | 2               | (Kawasaki <i>et al.</i> , 2003)  |
| 2004 | ECE    | urokinase protease                                                                                  | 0.04          | 6               | (Kim and Swartz, 2004)           |
| 2004 | ECE    | variant of human tissue-type plasminogen activator                                                  | 0.06          | 9               | (Yin and Swartz, 2004)           |
| 2005 | ECE    | granulocyte macrophage colony-stimulating factor                                                    | 0.043         | 2               | (Yang <i>et al.</i> , 2005)      |
| 2006 | ECE    | insulin-like growth factor I                                                                        | 0.4           | 3               | (Swartz, 2006)                   |
| 2007 | ECE    | single chain Fv antibody fragment / granulocyte macrophage colony-stimulating factor fusion protein | 0.03          | 2               | (Kanter <i>et al.</i> , 2007)    |
| 2008 | ECE    | [FeFe] hydrogenase                                                                                  | 0.022         |                 | (Boyer <i>et al.</i> , 2008)     |
| 2008 | WGE    | average of 13,364 human proteins                                                                    | 0.002         | variable        | (Goshima <i>et al.</i> , 2008)   |
| 2011 | ECE    | human Granulocyte macrophage colony-stimulating factor                                              | 0.7           | 2               | (Zawada <i>et al.</i> , 2011)    |
| 2011 | ECE    | human consensus interferon-alpha                                                                    | 0.4           | 2               | (El-Baky <i>et al.</i> , 2011)   |



## 2. Supplementary References

Boyer ME, Stapleton JA, Kuchenreuther JM, Wang C-w, Swartz JR. Cell-free synthesis and maturation of [FeFe] hydrogenases. *Biotechnol Bioeng*. 2008;99:59-67.

Calhoun KA, Swartz JR. An economical method for cell-free protein synthesis using glucose and nucleoside monophosphates. *Biotechnol Prog*. 2005a;21:1146-53.

Calhoun KA, Swartz JR. Energizing cell-free protein synthesis with glucose metabolism. *Biotechnol Bioeng*. 2005b;90:606-13.

Chumpolkulwong N, Hori-Takemoto C, Hosaka T, Inaoka T, Kigawa T, Shirouzu M, et al. Effects of *Escherichia coli* ribosomal protein S12 mutations on cell-free protein synthesis. *Eur J Biochem*. 2004;271:1127-34.

Endo Y, Sawasaki T. Cell-free expression systems for eukaryotic protein production. *Curr Opin Biotechnol*. 2006;17:4:373-380.

El-Baky NA, Omar SH, Redwan EM. The anti-cancer activity of human consensus interferon-alpha synthesized in cell-free system. *Protein Expr Purif*. 2011;In Press, Uncorrected Proof.

Ezure T, Suzuki T, Shikata M, Ito M, Ando E. A cell-free protein synthesis system from insect cells. *Methods Mol Biol*. 2010;607:31-42.

Goshima N, Kawamura Y, Fukumoto A, Miura A, Honma R, Satoh R, et al. Human protein factory for converting the transcriptome into an *in vitro*-expressed proteome. *Nat Methods*. 2008;5:1011-7.

Jewett MC, Calhoun KA, Voloshin A, Wu JJ, Swartz JR. An integrated cell-free metabolic platform for protein production and synthetic biology. *Mol Syst Biol*. 2008;4.

Jewett MC, Swartz JR. Mimicking the *Escherichia coli* cytoplasmic environment activates long-lived and efficient cell-free protein synthesis. *Biotechnol Bioeng*. 2004a;86:19-26.

Jewett MC, Swartz JR. Substrate replenishment extends protein synthesis with an *in vitro* translation system designed to mimic the cytoplasm. *Biotechnol Bioeng*. 2004b;87:465-71.

Kanter G, Yang J, Voloshin A, Levy S, Swartz JR, Levy R. Cell-free production of scFv fusion proteins: an efficient approach for personalized lymphoma vaccines. *Blood*. 2007;109:3393-9.

Kawasaki T, Gouda MD, Sawasaki T, Takai K, Endo Y. Efficient synthesis of a disulfide-containing protein through a batch cell-free system from wheat germ. *Eur J Biochem.* 2003;270:4780-6.

Kigawa T, Yabuki T, Yoshida Y, Tsutsui M, Ito Y, Shibata T, et al. Cell-free production and stable-isotope labeling of milligram quantities of proteins. *FEBS Lett.* 1999;442:15-9.

Kim D-M, Kigawa T, Cha-Yong C, Yokoyama S. A highly efficient cell-free protein synthesis system from *Escherichia coli*. *Eur J Biochem.* 1996;239:881-6.

Kim D-M, Swartz JR. Prolonging cell-free protein synthesis with a novel ATP regeneration system. *Biotechnol Bioeng.* 1999;66:180-8.

Kim D-M, Swartz JR. Prolonging cell-free protein synthesis by selective reagent additions. *Biotechnol Prog.* 2000;16:385-90.

Kim D-M, Swartz JR. Regeneration of adenosine triphosphate from glycolytic intermediates for cell-free protein synthesis. *Biotechnol Bioeng.* 2001;74:309-16.

Kim D-M, Swartz JR. Efficient production of a bioactive, multiple disulfide-bonded protein using modified extracts of *Escherichia coli*. *Biotechnol Bioeng.* 2004;85:122-9.

Kim H-C, Kim T-W, Kim D-M. Prolonged production of proteins in a cell-free protein synthesis system using polymeric carbohydrates as an energy source. *Process Biochemistry.* 2011;46:1366-9.

Klammt C, Schwarz D, Fendler K, Haase W, Dötsch V, Bernhard F. Evaluation of detergents for the soluble expression of  $\alpha$ -helical and  $\beta$ -barrel-type integral membrane proteins by a preparative scale individual cell-free expression system. *FEBS J.* 2005;272:6024-38.

Madin K, Sawasaki T, Ogasawara T, Endo Y. A highly efficient and robust cell-free protein synthesis system prepared from wheat embryos: Plants apparently contain a suicide system directed at ribosomes. *Proc Natl Acad Sci U S A.* 2000;97:559-64.

Noireaux V, Libchaber A. A vesicle bioreactor as a step toward an artificial cell assembly. *Proc Natl Acad Sci U S A.* 2004;101:17669-74.

Park N, Um SH, Funabashi H, Xu J, Luo D. A cell-free protein-producing gel. *Nat Mater.* 2009;8:432-7.

Promega. Optimize your TnT reticulocyte lysate systems reaction. 2010. <http://www.promega.com/resources/articles/pubhub/enotes/optimize-your-tnt-reticulocyte-lysate-systems-reaction/> Accessed: August 8<sup>th</sup>, 2011

Sawasaki T, Hasegawa Y, Morishita R, Seki M, Shinozaki K, Endo Y. Genome-scale, biochemical annotation method based on the wheat germ cell-free protein synthesis system. *Phytochemistry*. 2004;65:1549-55.

Sawasaki T, Hasegawa Y, Tsuchimochi M, Kamura N, Ogasawara T, Kuroita T, et al. A bilayer cell-free protein synthesis system for high-throughput screening of gene products. *FEBS Lett*. 2002a;514:102-5.

Sawasaki T, Ogasawara T, Morishita R, Endo Y. A cell-free protein synthesis system for high-throughput proteomics. *Proc Natl Acad Sci U S A*. 2002b;99:14652-7.

Spirin A, Baranov V, Ryabova L, Ovodov S, Alakhov Y. A continuous cell-free translation system capable of producing polypeptides in high yield. *Science*. 1988;242:1162-4.

Swartz J. Developing cell-free biology for industrial applications. *J Ind Microbiol Biotechnol*. 2006;33:476-85.

Voloshin AM, Swartz JR. Efficient and scalable method for scaling up cell free protein synthesis in batch mode. *Biotechnol Bioeng*. 2005;91:516-21.

Wang Y, Zhang Y-HP. Cell-free protein synthesis energized by slowly-metabolized maltodextrin. *BMC Biotechnol*. 2009;9:58.

Yang J, Kanter G, Voloshin A, Michel-Reydellet N, Velkeen H, Levy R, et al. Rapid expression of vaccine proteins for B-cell lymphoma in a cell-free system. *Biotechnol Bioeng*. 2005;89:503-11.

Yin G, Swartz JR. Enhancing multiple disulfide bonded protein folding in a cell-free system. *Biotechnol Bioeng*. 2004;86:188-95.

Zawada JF, Yin G, Steiner AR, Yang J, Naresh A, Roy SM, et al. Microscale to manufacturing scale-up of cell-free cytokine production—a new approach for shortening protein production development timelines. *Biotechnol Bioeng*. 2011;108:1570-8.
